# Supplementary material for: Copper nanoparticle interspersed MoS2 nanoflowers with enhanced efficiency for CO2 electrochemical reduction to fuel
Source: Royal Society of Chemistry journal article supplement (doi:10.1039/c6dt04381j), 2017-01-01
Supplement: c6dt04381j1.pdf [file c6dt04381j1.pdf]

## Supporting Information

### Copper Nanoparticles Interspersed MoS<sub>2</sub> Nanoflowers with Enhanced Efficiency for CO<sub>2</sub> Electrochemical Reduction to Fuel

Guodong Shi, Luo Yu, Xin Ba, Xiaoshu Zhang, Jianqing zhou and Ying Yu\*

<sup>a</sup>Institute of Nanoscience and Nanotechnology, College of Physical Science and  
Technology, Central China Normal University, Wuhan 430079, China

\* Corresponding author. Tel: 86-27-67867037; email: [yuying01@mail.ccnu.edu.cn](mailto:yuying01@mail.ccnu.edu.cn)

Figure S1. Raman spectra of bare flower-like MoS<sub>2</sub>.

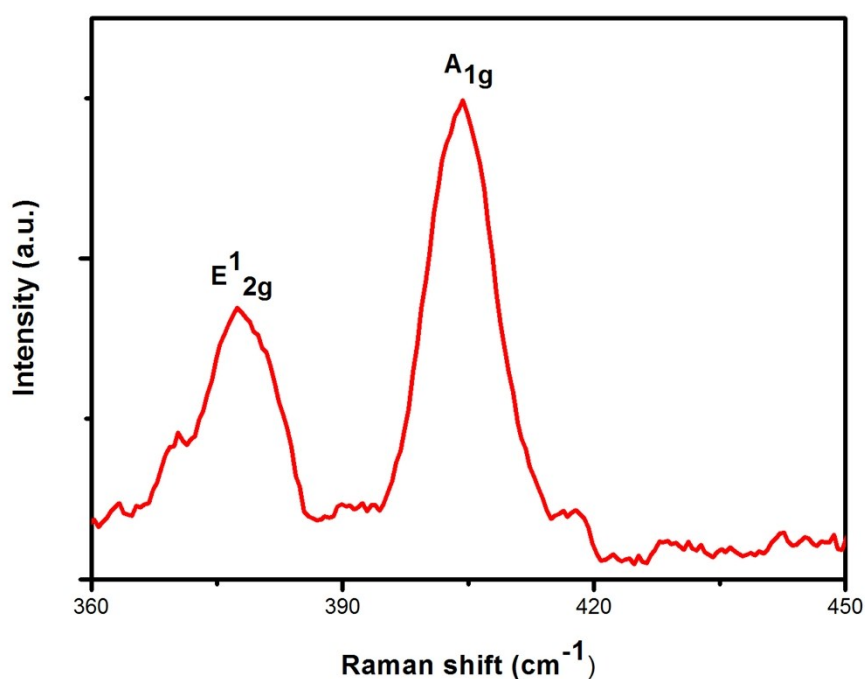

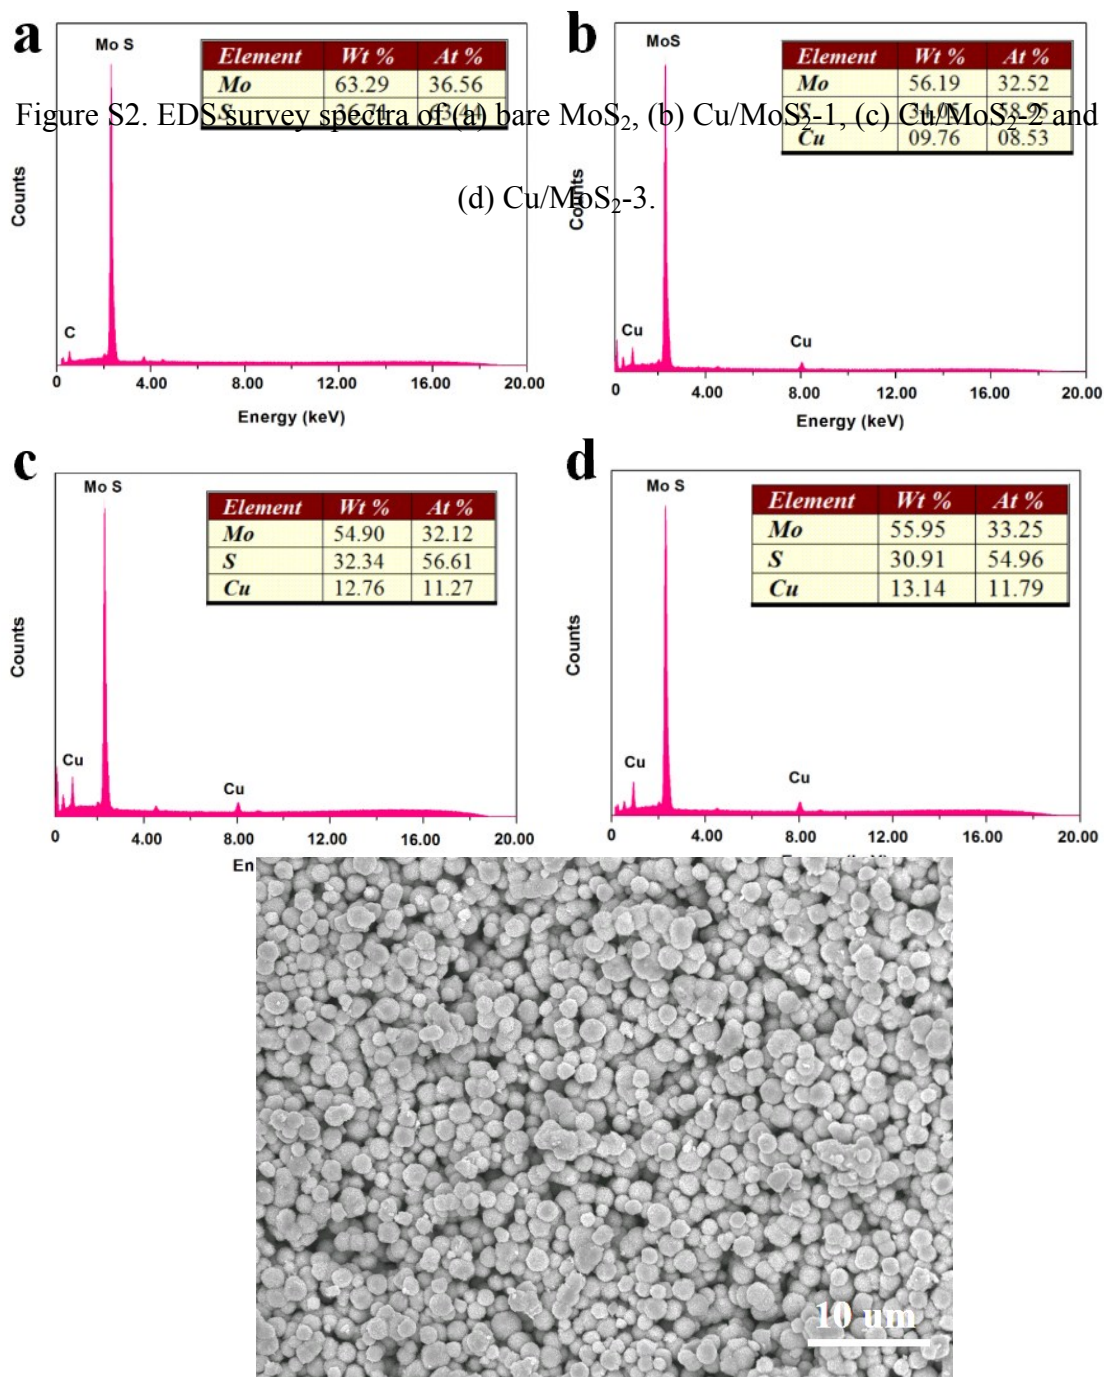

Figure S3. Low magnification SEM image of Cu/MoS<sub>2</sub>-2.

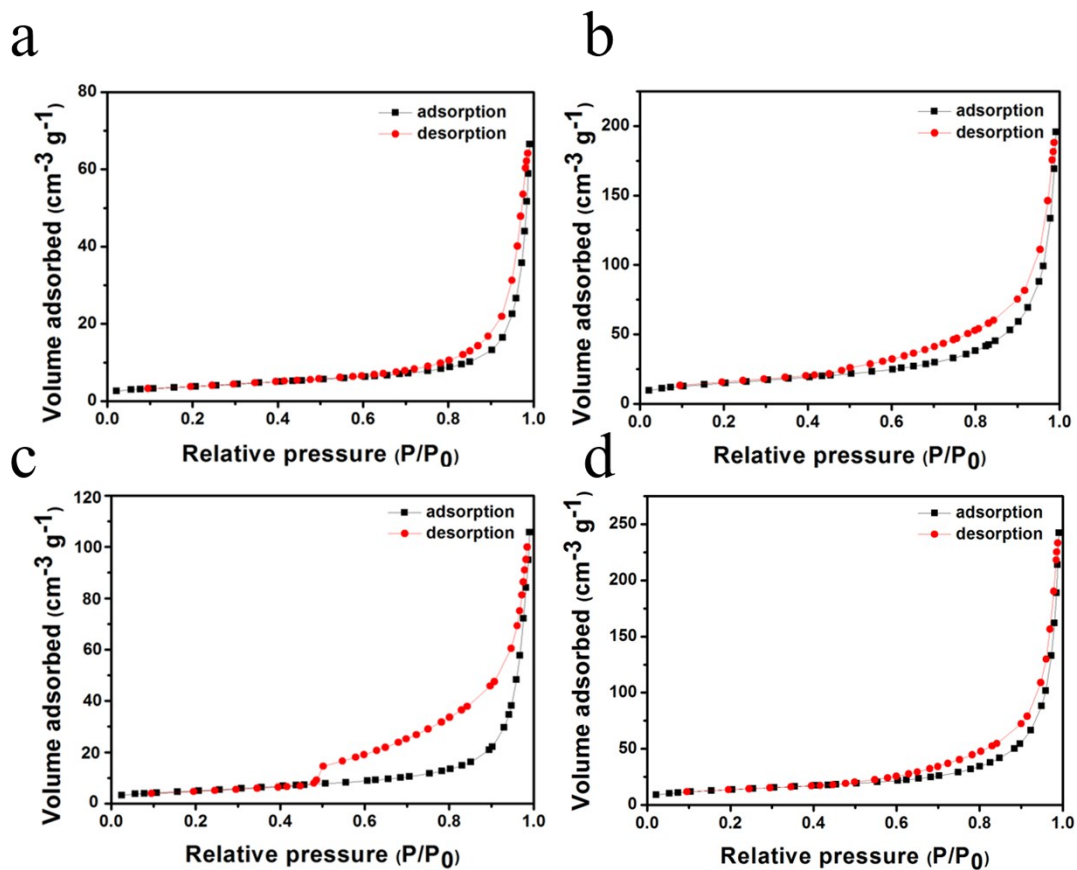

Figure S4. N<sub>2</sub> adsorption–desorption isotherm curves for all prepared samples: (a) bare MoS<sub>2</sub>, (b) Cu/MoS<sub>2</sub>-1, (c) Cu/MoS<sub>2</sub>-2 and (d) Cu/MoS<sub>2</sub>-3.

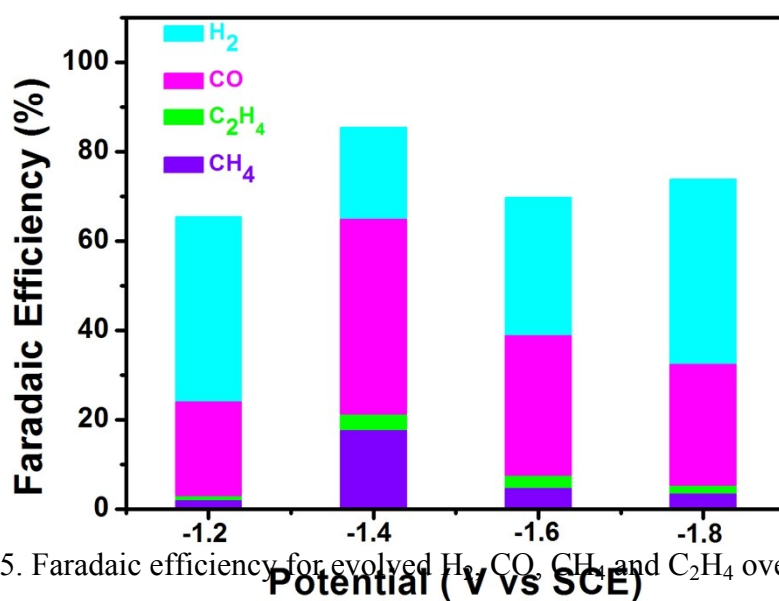

Figure S5. Faradaic efficiency for evolved  $H_2$ ,  $CO$ ,  $CH_4$  and  $C_2H_4$  over  $Cu/MoS_2-2$  at different applied potentials.

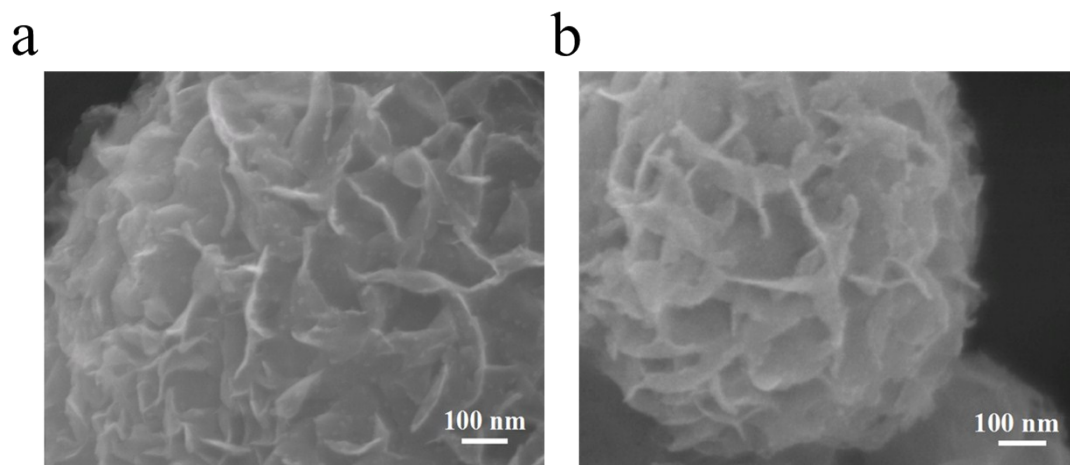

Figure S6. SEM images of Cu/MoS<sub>2</sub>-2 (a) before and (b) after 48 h CO<sub>2</sub> electrochemical reduction.

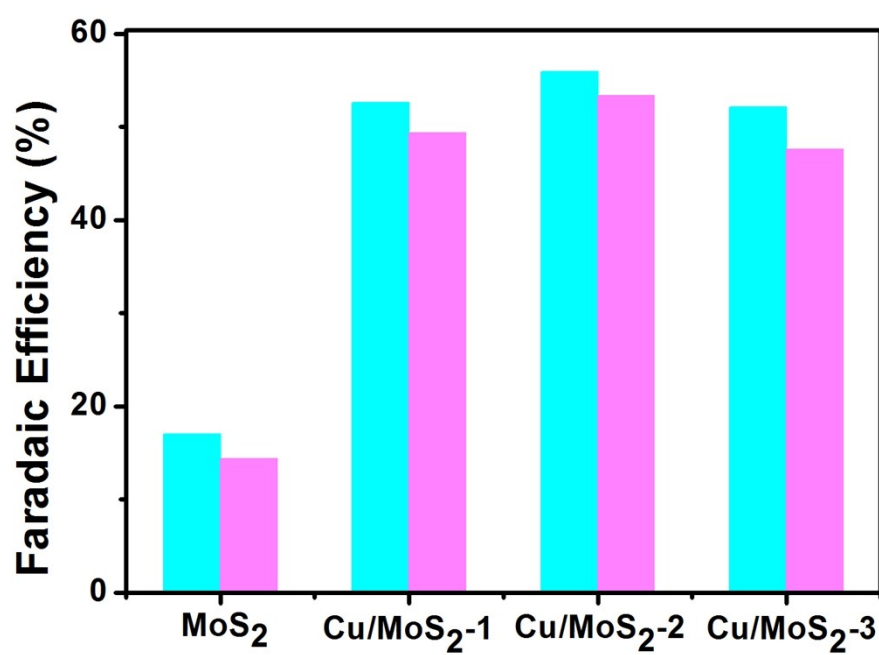

Figure S7. Faradaic efficiency of all prepared samples before (cyan) and after (magenta) 48 h electrochemical CO<sub>2</sub> reduction reaction.
